# Supplementary material
Source: publisher site journal article supplement (https://www.dovepress.com/article/219872)
Supplement: Supplementary file 1 [file get_supplementary_file.php]

**Supplementary Material**

Table S1

| **A** | **Test** | **Gene** | **p-Value** | **lower CI** | **higher CI** | **B** | **Gene** | **Variable** | **Likelyhood Ratio Test** | **Score (logrank) Test** | **Wald Test** |
| --- | --- | --- | --- | --- | --- | --- | --- | --- | --- | --- | --- |
|  | Students t-Test | Platinresistenz.AB by KLRC1 | 0,0025 | 8,5 | 33,7 |  | HSD11B1 dependent Rezitive Free Survival | RFS | 0,0063 | 0,0110 | 0,0150 |
|  | Wilcox Rank Sum Test | Platinresistenz.AB by TCF7 | 0,0025 | 43,4 | 198,3 |  | DMBT1 dependent Rezitive Free Survival | RFS | 0,0110 | 0,0360 | 0,0560 |
|  | Wilcox Rank Sum Test | Platinresistenz.AB by CD274 | 0,0031 | 25,5 | 102,7 |  | IKBKG dependent Rezitive Free Survival | RFS | 0,0120 | 0,0130 | 0,0150 |
|  | Wilcox Rank Sum Test | Platinresistenz.AB by HSD11B1 | 0,0038 | -54,8 | -9,9 |  | CKLF dependent Rezitive Free Survival | RFS | 0,0190 | 0,0220 | 0,0270 |
|  | Wilcox Rank Sum Test | Platinresistenz.AB by COLEC12 | 0,0039 | 26,0 | 258,1 |  | NUP107 dependent Overall Survival | OS | 0,0017 | 0,0042 | 0,0059 |
|  | Wilcox Rank Sum Test | Platinresistenz.AB by PDGFC | 0,0039 | -597,2 | -99,3 |  | CCL18 dependent Overall Survival | OS | 0,0041 | 0,0320 | 0,1100 |
|  | Students t-Test | Platinresistenz.AB by FCF1 | 0,0040 | -719,7 | -156,7 |  | LY96 dependent Overall Survival | OS | 0,0041 | 0,0061 | 0,0087 |
|  | Students t-Test | Platinresistenz.AB by BMI1 | 0,0053 | -233,0 | -48,0 |  | ATG5 dependent Overall Survival | OS | 0,0045 | 0,0033 | 0,0072 |
|  | Wilcox Rank Sum Test | Platinresistenz.AB by TNFRSF9 | 0,0073 | 0,9 | 11,1 |  | SLAMF7 dependent Overall Survival | OS | 0,0065 | 0,0260 | 0,0430 |
|  | Students t-Test | Platinresistenz.AB by ATG10 | 0,0078 | -77,2 | -13,9 |  | SDHA dependent Overall Survival | OS | 0,0072 | 0,0027 | 0,0045 |
|  | Students t-Test | Platinresistenz.AB by EWSR1 | 0,0090 | 69,8 | 430,9 |  | CXCL9 dependent Overall Survival | OS | 0,0082 | 0,0190 | 0,0290 |

Figure S1

Figure S2
